# Supplementary material
Source: Springer Nature journal article supplement (https://www.springermedizin.de/resource/supplementary/12992_2012_178_MOESM1_ESM.pdf/9616632)
Supplement: MOESM1 [file 9616632]

Number of medical schools  
teaching global health topics

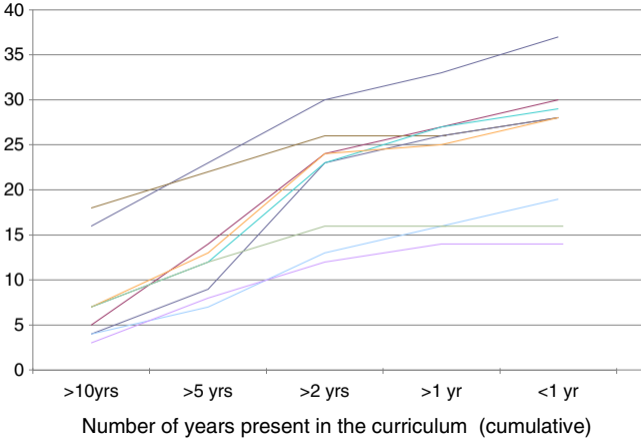

- International elective exchanges
- The effects of poverty and inequality on health
- Tropical medicine
- Globalization and health
- International comparison of health systems
- International comparison of burden of disease
- Travel medicine
- International health and development
- International movement of people
